# Supplementary material for: A generalized regression model of arsenic variations in the shallow groundwater of Bangladesh
Source: PubMed Central journal article supplement (PMC4964952; doi:10.1002/2013wr014572), 2015-01-28
Supplement: WRCR-51-685-s002.pdf [file WRCR-51-685-s002.pdf]

```
#####
# Function to compare restricted and extended models (class of lm, glm or
# survival) where observations fall within certain clusters and show inter-
# site dependence. This is a likelihood ratio test like anova() where cluster
# information is taken into account by default.
#####

# source("Bangladesh_As_adjusted_LR_test_GRM.r")

LRtest <- function(model0, model1, cluster) {

#####
# Compares restricted and extended models that have been fitted to the same
# set of clustered data using an "independence" loglikelihood. The comparison
# is done using an adjusted likelihood ratio test, as described in
# Chandler & Bate (Biometrika, 2007) but using the *vertical* scaling of the
# log-likelihood as in their equation (25), rather than the horizontal
# scaling that is studied in detail elsewhere in the paper (the two
# procedures are asymptotically equivalent, but vertical scaling is
# computationally cheaper). Note that with vertical scaling, the numerator
# of the scaling factor in equation (25) cancels with the denominator of the
# secondary adjustment in equation (20) - the whole thing can therefore be
# done at one stroke.
#####
# Arguments:
#
# model0      A model object corresponding to the restricted model
# model1      Ditto, extended model
# cluster     A vector of variables defining clusters for each case
#             in the database used for model (required if the model
#             objects are of class lm, glm, or survreg)
#####

if (!identical(class(model0),class(model1))) {
  stop("model0 and model1 have different classes!")
}
if (any(class(model0) %in% c("lm","glm","survreg")))) {
#
# Check same response variable in each model (code lifted from
# anova.lm)
#
responses <- as.character(lapply(list(model0,model1),
                                function(x) deparse(x$terms[[2]])))

if (!all(responses == responses[1])) {
stop("Models have different responses")
}
#
# Check that models are nested, and determine the constraints
# for the restricted one.
#
theta0 <- coef(model0); theta1 <- coef(model1)
if (!all(names(theta0) %in% names(theta1))) {
  stop("model0 is not nested within model1")
}
p0 <- length(theta0); p1 <- length(theta1)
#
# For survreg objects, the scale parameter is also included
# in the ML fit. Although this isn't included in all models ...
# to find out whether or not to include it, nick some code
# from getS3method("summary","survreg"). Also take the
# opportunity to check that the survreg fit contains both
# naive and robust covariance matrix estimates
#
if (class(model1)[1] == "survreg") {
  if (is.null(model1$naive.var)) stop("no clusters defined in model1")
}
}
}

```

```

p.all <- nrow(model0$var)
if (p.all > p0) {
  theta0 <- c(theta0, log(model0$scale))
  if (p.all - p0 == 1) {
    names(theta0) <- c(names(model0$coefficients), "Log(scale)")
  } else {
    names(theta0) <- c(names(model0$coefficients), names(model0$scale))
  }
p0 <- p.all
}
p.all <- nrow(model1$var)
if (p.all > p1) {
  theta1 <- c(theta1, log(model1$scale))
  if (p.all - p1 == 1) {
    names(theta1) <- c(names(model1$coefficients), "Log(scale)")
  } else {
    names(theta1) <- c(names(model1$coefficients), names(model1$scale))
  }
p1 <- p.all
}
kept.pars <- match(names(theta0), names(theta1))
theta.tmp <- round(theta1 - theta0) # To copy the coefficient names
theta.tmp[kept.pars] <- theta0
theta0 <- theta.tmp
zero.pos <- (1:p1)[-kept.pars]

#####
# Covariance matrix calculations, and log-likelihoods. For linear and
# generalised linear models the latter are derived from the deviances /
# residual sums of squares, converted back to the log-likelihood scale,
# because it isn't clear that the logLik function gives the right thing.
# Actually, in the case of an unknown dispersion parameter we do *not*
# use full ML fits of both models - rather, we take the moment estimate from
# the larger model as fixed. This is OK, because the estimate will differ
# from the *true* dispersion parameter by an amount that is  $O(k^{-0.5})$  in
# probability and the computed (naive) likelihood ratio statistic is
# calculated as  $(D0-D1) / \hat{\phi} = [(D0-D1)/\phi] * [1 + O(k^{-0.5})]$ 
# which is asymptotically equivalent to the chi-squared statistic you'd get
# if phi were known. The reason for proceeding this way is to ensure
# compatibility with (e.g.) quasi-Wald statistics, which just use dispersion
# estimates from the extended model. If you *don't* do this, then the ML
# estimate of the dispersion parameter in the restricted model can 'hide'
# much of the lack of fit and reduce the significance of extra terms
# (or, at least, indicate that they're not necessary because the extra
# variation can be explained via increased dispersion). That seems a bit
# heuristic - need to understand this a bit better! NB can't use the normal
# F ratio to cope with the unknown dispersion, because the residual deviance
# doesn't have the same chi-squared distribution as in the independence case.
#####

n <- p1 + model1$df.residual
if (class(model1)[1] == "lm") {
  summ1 <- lm.clus.sum(model1, cluster=cluster)
  sigsq <- summ1$sigma^2
  logL1 <- -model1$df.residual
  RSS0 <- (n-p0) * summary(model0)$sigma^2
  logL0 <- -RSS0/sigsq
  R <- summ1$cov.scaled; N <- summ1$cov.unscaled
} else if (class(model1)[1] == "glm") {
  if (!identical(model0$family[1:2], model1$family[1:2])) {
    stop("model0 and model1 have different 'family' attributes")
  }
  summ0 <- summary(model0)
  summ1 <- glm.clus.sum(model1, cluster=cluster)

```

```

dispersion <- summ1$dispersion
logL0 <- -summ0$deviance / (2*dispersion)
logL1 <- -summ1$deviance / (2*dispersion)
R <- summ1$cov.scaled; N <- summ1$cov.unscaled
} else if (class(modell)[1] == "survreg") {
logL0 <- model0$loglik[2]
logL1 <- modell$loglik[2]
R <- modell$var; N <- modell$naive.var
}
}

#
# OK: here's the scaling factor.
#
thetadiff <- theta1 - theta0; psidiff <- theta1[zero.pos]
H <- -solve(N); H.adj <- -solve(R)
R.psi.inv <- -solve(R[zero.pos, zero.pos])
scalfac <- (t(psidiff) %*% R.psi.inv %*% psidiff) /
            (t(thetadiff) %*% H %*% thetadiff)

df <- p1-p0
LR.naive <- 2*(logL1-logL0)
pval.naive <- pchisq(LR.naive, df=df, lower.tail=FALSE)
LR.adj <- LR.naive*scalfac
pval.adj <- pchisq(LR.adj, df=df, lower.tail=FALSE)
data.frame(Lambda=c(LR.naive, LR.adj),
            P.value=c(pval.naive, pval.adj),
            row.names=c("Naive", "Adjusted"))
}

# end of the script written by Richard Chandler, Professor of Statistics at
# the Department of Statistical Science at University College London.
# E-mail: r.chandler@ucl.ac.uk

```
