# Supplementary material for: A generalized regression model of arsenic variations in the shallow groundwater of Bangladesh
Source: PubMed Central journal article supplement (PMC4964952; doi:10.1002/2013wr014572), 2015-01-28
Supplement: WRCR-51-685-s005.pdf [file WRCR-51-685-s005.pdf]

Model outputs from R programming language:

Parametric Survival Model: weibull Distribution

```
survreg(formula = Surv(Arsenic, Censor, type = "left") ~ factor(GeoAbb) +
  USCunit + HydCond + wellDepth + GWLtrend + RechPGI + Rchange +
  LongLeg1 + LatLeg1 + LongLeg2 + LatLeg2 + LongLeg1:LatLeg1 +
  IrrigTrends + factor(GeoAbb):wellDepth + factor(GeoAbb):USCunit +
  factor(GeoAbb):RechPGI + cluster(ClusterID), data = model.data,
  dist = "weibull")
```

|                            | Value   | Std. Err | (Naive SE) | z       | p        |
|----------------------------|---------|----------|------------|---------|----------|
| (Intercept)                | 4.6475  | 0.48114  | 0.528912   | 9.6594  | 4.48e-22 |
| factor(GeoAbb)1            | -2.0228 | 2.47101  | 1.893165   | -0.8186 | 4.13e-01 |
| factor(GeoAbb)2            | -3.6682 | 1.29453  | 0.876850   | -2.8336 | 4.60e-03 |
| factor(GeoAbb)3            | 3.0609  | 0.86422  | 0.811725   | 3.5418  | 3.97e-04 |
| factor(GeoAbb)4            | -0.8736 | 1.30705  | 1.220783   | -0.6684 | 5.04e-01 |
| factor(GeoAbb)5            | 1.6829  | 0.99754  | 0.782695   | 1.6870  | 9.16e-02 |
| factor(GeoAbb)6            | -0.0530 | 1.45670  | 1.104601   | -0.0364 | 9.71e-01 |
| factor(GeoAbb)7            | -1.7956 | 1.26031  | 1.273628   | -1.4247 | 1.54e-01 |
| factor(GeoAbb)8            | 0.4504  | 0.64950  | 1.180497   | 0.6935  | 4.88e-01 |
| factor(GeoAbb)9            | -2.7515 | 2.23123  | 2.223838   | -1.2332 | 2.18e-01 |
| factor(GeoAbb)10           | 1.1280  | 1.25356  | 1.839817   | 0.8998  | 3.68e-01 |
| factor(GeoAbb)11           | 0.9383  | 0.77063  | 0.860189   | 1.2176  | 2.23e-01 |
| factor(GeoAbb)12           | -2.5077 | 1.02506  | 0.825883   | -2.4464 | 1.44e-02 |
| factor(GeoAbb)13           | 0.4948  | 1.21544  | 0.950879   | 0.4071  | 6.84e-01 |
| factor(GeoAbb)14           | 2.5548  | 1.94457  | 1.565542   | 1.3138  | 1.89e-01 |
| USCunit                    | -0.0233 | 0.01744  | 0.019820   | -1.3357 | 1.82e-01 |
| HydCond                    | -0.0256 | 0.00960  | 0.007216   | -2.6677 | 7.64e-03 |
| wellDepth                  | -0.0124 | 0.00916  | 0.009720   | -1.3532 | 1.76e-01 |
| GWLtrend                   | 0.0339  | 0.01409  | 0.011848   | 2.4064  | 1.61e-02 |
| RechPGI                    | -0.0006 | 0.00403  | 0.004033   | -0.1489 | 8.82e-01 |
| Rchange                    | -0.0043 | 0.00123  | 0.000957   | -3.5086 | 4.50e-04 |
| LongLeg1                   | -0.6278 | 0.34899  | 0.367816   | -1.7989 | 7.20e-02 |
| LatLeg1                    | -1.2590 | 0.49703  | 0.453192   | -2.5331 | 1.13e-02 |
| LongLeg2                   | -0.8508 | 0.29375  | 0.255948   | -2.8963 | 3.78e-03 |
| LatLeg2                    | -0.6961 | 0.70548  | 0.561110   | -0.9867 | 3.24e-01 |
| LongLeg1:LatLeg1           | 0.6615  | 0.58344  | 0.614508   | 1.1338  | 2.57e-01 |
| IrrigTrends                | -0.0564 | 0.03006  | 0.022457   | -1.8763 | 6.06e-02 |
| factor(GeoAbb)1:wellDepth  | 0.0460  | 0.06266  | 0.042613   | 0.7341  | 4.63e-01 |
| factor(GeoAbb)2:wellDepth  | 0.1043  | 0.02487  | 0.018876   | 4.1939  | 2.74e-05 |
| factor(GeoAbb)3:wellDepth  | -0.0468 | 0.01633  | 0.016045   | -2.8661 | 4.16e-03 |
| factor(GeoAbb)4:wellDepth  | 0.0395  | 0.03939  | 0.038301   | 1.0029  | 3.16e-01 |
| factor(GeoAbb)5:wellDepth  | 0.0217  | 0.01598  | 0.014806   | 1.3583  | 1.74e-01 |
| factor(GeoAbb)6:wellDepth  | 0.0016  | 0.04745  | 0.027597   | 0.0337  | 9.73e-01 |
| factor(GeoAbb)7:wellDepth  | -0.0532 | 0.02204  | 0.027088   | -2.4140 | 1.58e-02 |
| factor(GeoAbb)8:wellDepth  | -0.0130 | 0.01594  | 0.025617   | -0.8154 | 4.15e-01 |
| factor(GeoAbb)9:wellDepth  | -0.0629 | 0.07318  | 0.066378   | -0.8596 | 3.90e-01 |
| factor(GeoAbb)10:wellDepth | 0.0084  | 0.02036  | 0.045213   | 0.4126  | 6.80e-01 |
| factor(GeoAbb)11:wellDepth | 0.0155  | 0.01725  | 0.016536   | 0.8985  | 3.69e-01 |
| factor(GeoAbb)12:wellDepth | 0.0384  | 0.01387  | 0.017328   | 2.7678  | 5.64e-03 |
| factor(GeoAbb)13:wellDepth | -0.0081 | 0.02313  | 0.019875   | -0.3502 | 7.26e-01 |
| factor(GeoAbb)14:wellDepth | 0.0000  | 0.03675  | 0.034355   | 0.0000  | 1.00e+00 |
| factor(GeoAbb)1:USCunit    | -0.0621 | 0.03939  | 0.047992   | -1.5767 | 1.15e-01 |
| factor(GeoAbb)2:USCunit    | 0.0538  | 0.02567  | 0.030444   | 2.0960  | 3.61e-02 |
| factor(GeoAbb)3:USCunit    | -0.0869 | 0.03645  | 0.034630   | -2.3840 | 1.71e-02 |
| factor(GeoAbb)4:USCunit    | 0.0774  | 0.06208  | 0.046120   | 1.2468  | 2.12e-01 |
| factor(GeoAbb)5:USCunit    | -0.1297 | 0.04309  | 0.029828   | -3.0098 | 2.61e-03 |
| factor(GeoAbb)6:USCunit    | 0.0682  | 0.07711  | 0.069355   | 0.8845  | 3.76e-01 |
| factor(GeoAbb)7:USCunit    | 0.0962  | 0.04611  | 0.052974   | 2.0863  | 3.69e-02 |

Shamsudduha\_etal\_SI\_Final\_GRM\_full\_results\_19Nov14

|                           |         |         |          |         |          |
|---------------------------|---------|---------|----------|---------|----------|
| factor(Geo\Abb)8:USCunit  | 0.0355  | 0.03767 | 0.067396 | 0.9425  | 3.46e-01 |
| factor(Geo\Abb)9:USCunit  | 0.1564  | 0.10364 | 0.095686 | 1.5091  | 1.31e-01 |
| factor(Geo\Abb)10:USCunit | -0.0080 | 0.05288 | 0.107360 | -0.1513 | 8.80e-01 |
| factor(Geo\Abb)11:USCunit | -0.0378 | 0.03319 | 0.032996 | -1.1388 | 2.55e-01 |
| factor(Geo\Abb)12:USCunit | -0.0231 | 0.03696 | 0.030869 | -0.6249 | 5.32e-01 |
| factor(Geo\Abb)13:USCunit | -0.0069 | 0.03212 | 0.031252 | -0.2148 | 8.30e-01 |
| factor(Geo\Abb)14:USCunit | 0.0035  | 0.04334 | 0.058935 | 0.0807  | 9.36e-01 |
| factor(Geo\Abb)1:RechPGI  | 0.0033  | 0.00986 | 0.007655 | 0.3346  | 7.38e-01 |
| factor(Geo\Abb)2:RechPGI  | 0.0030  | 0.00429 | 0.004299 | 0.6990  | 4.85e-01 |
| factor(Geo\Abb)3:RechPGI  | -0.0018 | 0.00401 | 0.004048 | -0.4483 | 6.54e-01 |
| factor(Geo\Abb)4:RechPGI  | -0.0010 | 0.00432 | 0.004516 | -0.2316 | 8.17e-01 |
| factor(Geo\Abb)5:RechPGI  | 0.0002  | 0.00436 | 0.004121 | 0.0459  | 9.63e-01 |
| factor(Geo\Abb)6:RechPGI  | -0.0289 | 0.01449 | 0.010593 | -1.9951 | 4.60e-02 |
| factor(Geo\Abb)7:RechPGI  | -0.0005 | 0.01130 | 0.012255 | -0.0443 | 9.65e-01 |
| factor(Geo\Abb)8:RechPGI  | 0.0068  | 0.00958 | 0.012903 | 0.7099  | 4.78e-01 |
| factor(Geo\Abb)9:RechPGI  | 0.0246  | 0.04298 | 0.042860 | 0.5723  | 5.67e-01 |
| factor(Geo\Abb)10:RechPGI | -0.0034 | 0.00924 | 0.012852 | -0.3681 | 7.13e-01 |
| factor(Geo\Abb)11:RechPGI | 0.0026  | 0.00432 | 0.004633 | 0.6015  | 5.48e-01 |
| factor(Geo\Abb)12:RechPGI | 0.0289  | 0.01194 | 0.008085 | 2.4199  | 1.55e-02 |
| factor(Geo\Abb)13:RechPGI | -0.0014 | 0.00584 | 0.004621 | -0.2396 | 8.11e-01 |
| factor(Geo\Abb)14:RechPGI | -0.0215 | 0.00907 | 0.006859 | -2.3717 | 1.77e-02 |
| Log(scale)                | 0.6515  | 0.05721 | 0.023417 | 11.3885 | 4.77e-30 |

Scale= 1.92

Weibull distribution

Loglik(model)= -6219.9 Loglik(intercept only)= -6780.2

Chisq= 1120.45 on 68 degrees of freedom, p= 0

(Loglikelihood assumes independent observations)

Number of Newton-Raphson Iterations: 6

n= 1643

Abbreviation key:

USCunit=thickness of surficial silt and clay (TSSC),  
 HydCond=hydraulic conductivity,  
 WellDepth=surveyed tubewell depth,  
 GWLtrend= trends in mean groundwater levels,  
 RechPGI=mean recharge for pre-developed groundwater-fed irrigation period,  
 Rchange=net changes in groundwater recharge,  
 Long=tubewell location longitude,  
 Lat=tubewell location latitude, and  
 IrrigTrends=groundwater-fed irrigation trends.  
 Value denotes model coefficient;  
 Std. Err and S.E. denote standard error of coefficients, and  
 (:) denotes statistical interaction term.
